# Supplementary material for: The longevity-promoting factor, TCER-1, widely represses stress resistance and innate immunity
Source: PubMed Central journal article supplement (PMC6637209; doi:10.1038/s41467-019-10759-z), 2019-07-17
Supplement: 41467_2019_10759_MOESM3_ESM.pdf [file 41467_2019_10759_MOESM3_ESM.pdf]

## Description of Additional Supplementary Files

**File name:** Supplementary Data 1

**Description:** The impact of TCER-1 expression in individual tissues on the lifespan of wild-type animals as well as *tcer-1*, *glp-1* and *tcer-1;glp-1* mutants. TCER-1 was driven under control of (1A) *tcer-1* endogenous promoter (1B) intestine-specific promoter (1C) Neuron-specific promoter (1D) muscle-specific promoter and (1E) hypodermis-specific promoter.
